# Supplementary material for: The hepatocyte-specifically expressed lnc-HSER alleviates hepatic fibrosis by inhibiting hepatocyte apoptosis and epithelial-mesenchymal transition
Source: Theranostics. 2019 Oct 12;9(25):7566–82. doi: 10.7150/thno.36942 (PMC6831459; doi:10.7150/thno.36942)
Supplement: Supplementary file 1 — Supplementary figures and tables. [file thnov09p7566s1.pdf]

**The hepatocyte-specifically expressed Inc-HSER alleviates hepatic fibrosis by inhibiting hepatocyte apoptosis and epithelial-mesenchymal transition**

Kun Zhang<sup>1, #</sup>, Mengxia Zhang<sup>1, #</sup>, Qingbin Yao<sup>1, #</sup>, Xiaohui Han<sup>1, #</sup>, Yanmian Zhao<sup>1</sup>, Lina Zheng<sup>1</sup>, Guantong Li<sup>2</sup>, Qi Liu<sup>1</sup>, Yanan Chang<sup>3</sup>, Peijun Zhang<sup>4</sup>, Hongmei Cui<sup>1</sup>, Zhemin Shi<sup>1</sup>, Ting Chen<sup>1</sup>, Zhi Yao<sup>5</sup>, Tao Han<sup>2</sup>, Wei Hong<sup>1, \*</sup>

<sup>1</sup>Department of Histology and Embryology, Key Laboratory of Immune Microenvironment and Disease of Ministry of Education, Tianjin Key Laboratory of Cellular and Molecular Immunology, School of Basic Medical Sciences, Tianjin Medical University, Tianjin, China

<sup>2</sup>The Third Central Clinical College of Tianjin Medical University, Department of Hepatology and Gastroenterology, Tianjin Third Central Hospital, Tianjin Key Laboratory of Artificial Cells, Artificial Cell Engineering Technology Research Center of Public Health Ministry, Tianjin, China

<sup>3</sup>Department of Pathology, Institute of Hematology and Blood Diseases Hospital, Chinese Academy of Medical Sciences and Peking Union Medical College, Tianjin, China

<sup>4</sup>Tianjin Central Hospital of Gynecology Obstetrics, Tianjin, China

<sup>5</sup>Department of Immunology, Key Laboratory of Immune Microenvironment and Disease of Ministry of Education, Tianjin Key Laboratory of Cellular and Molecular Immunology, School of Basic Medical Sciences, Tianjin Medical University, Tianjin, China

<sup>#</sup>These authors contributed equally to this work.

**\*Corresponding authors:** Wei Hong, Department of Histology and Embryology, School of Basic Medical Sciences, Tianjin Medical University, Tianjin, China. E-mail: [hongwei@tmu.edu.cn](mailto:hongwei@tmu.edu.cn).

Supplementary Information

Supplementary Figures

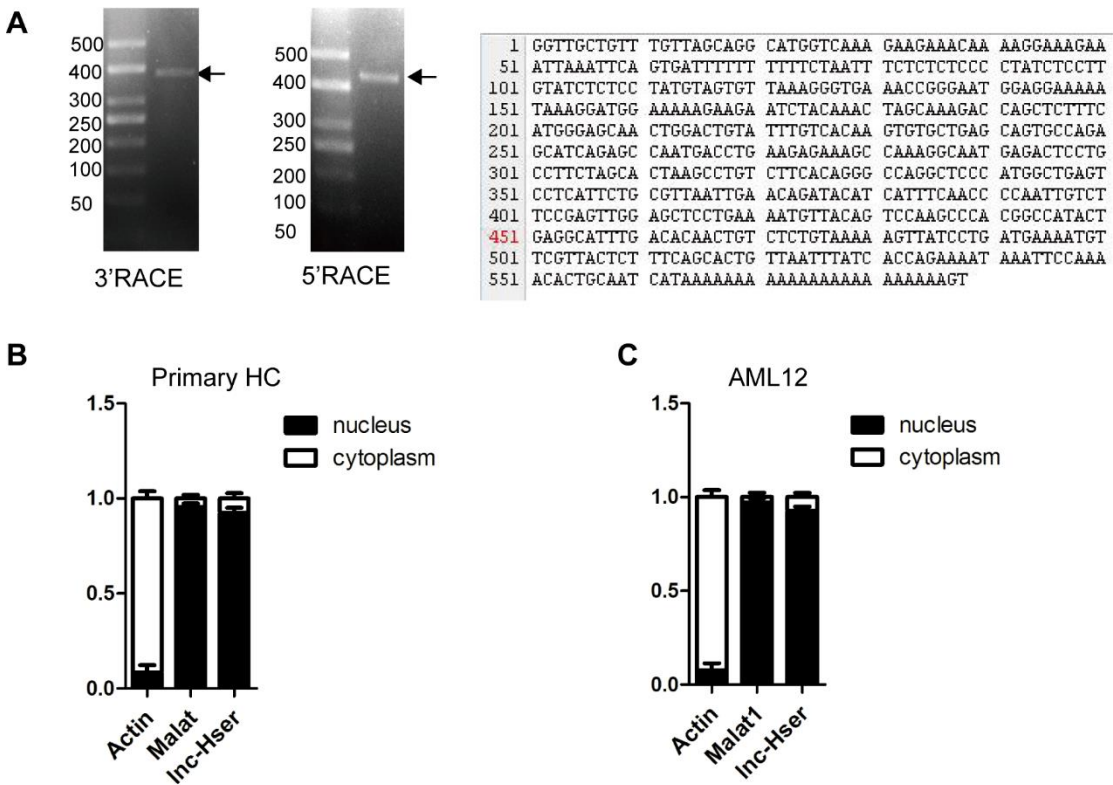

**Fig. S1, related to Fig. 1.** (A) Agarose gel electrophoresis of PCR products from the 5'-RACE procedure and 3'-RACE procedure. The molecular weight markers (base pairs) are indicated on the side. The major PCR product is marked with an arrow. Nucleotide sequence of the full-length Inc-Hser was confirmed by RACE in mouse livers. (B, C) RNA was extracted from the nuclei or cytoplasm of primary HCs and AML12 cells. 1  $\mu$ g of RNA was used for the qRT-PCR analysis of *Inc-Hser*, *Malat1* (nuclear retained), and  $\beta$ -actin mRNAs (cytoplasm retained). The data are expressed as the mean  $\pm$  SD for at least triplicate experiments.

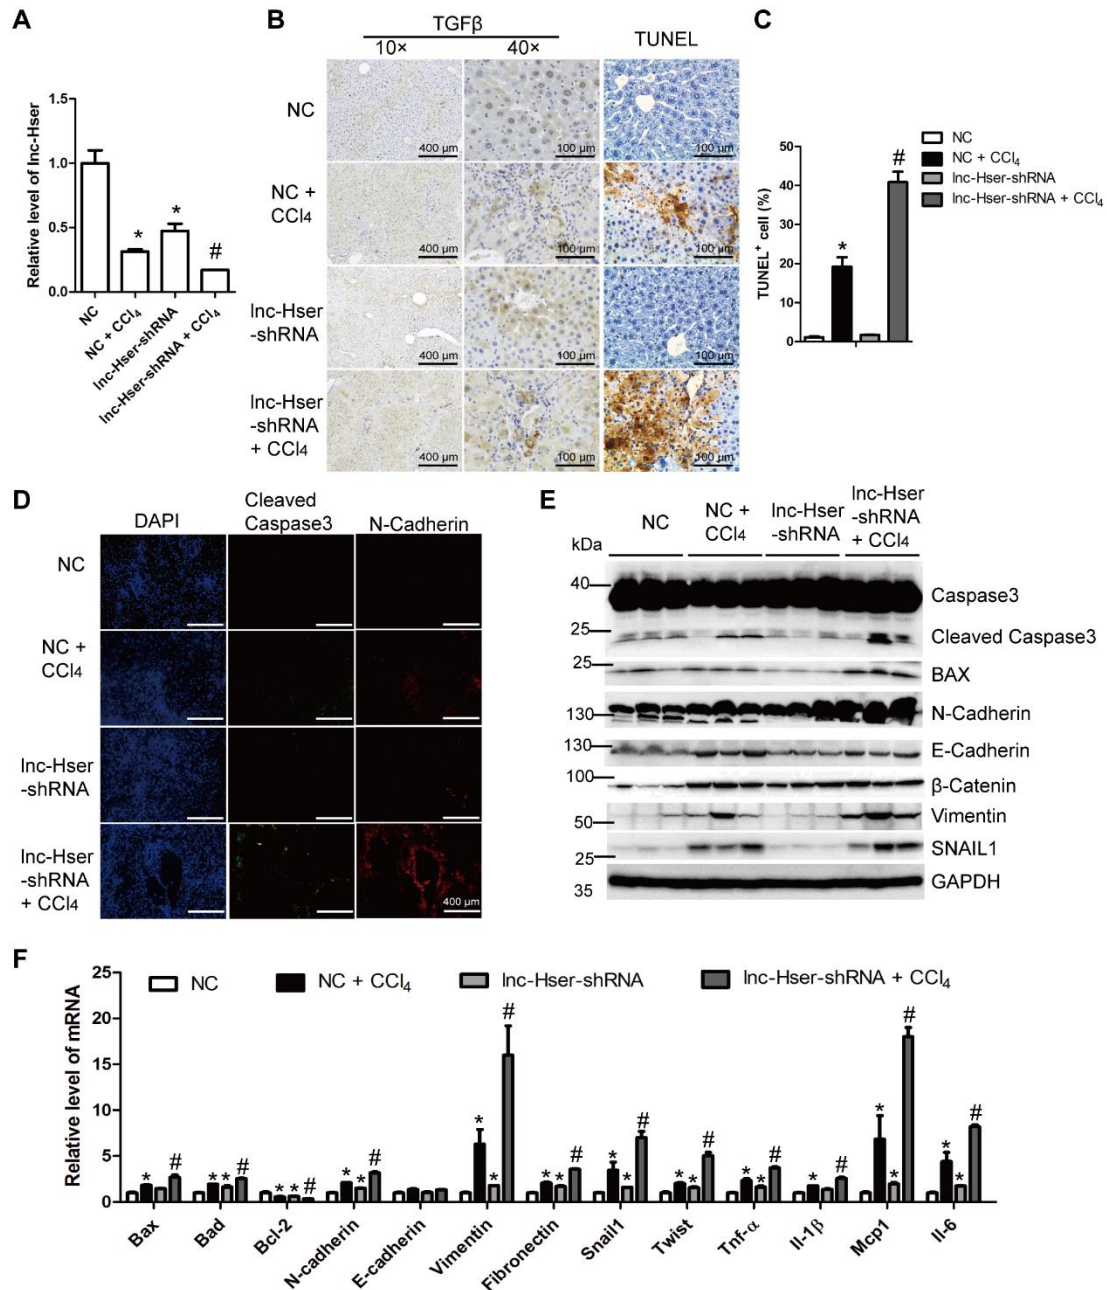

**Fig. S2, related to Fig. 2.** Mice were treated with oil in combination with injection of lenti-NC (Negative Control,  $n = 10$ ), or CCl<sub>4</sub> in combination with injection of lenti-NC (NC + CCl<sub>4</sub>,  $n = 10$ ), or oil in combination with injection of lenti-Inc-Hser-shRNA (Inc-Hser-shRNA,  $n = 10$ ), or CCl<sub>4</sub> in combination with injection of lenti-Inc-Hser-shRNA (Inc-Hser-shRNA + CCl<sub>4</sub>,  $n = 10$ ). (A) The expression of *Inc-Hser* in livers of each group was examined by qRT-PCR. (B) Liver fibrosis was evaluated by IHC for TGFβ and TUNEL staining; scale bar = 400 μm for 10× and 100 μm for 40×. (C) Quantification of TUNEL staining. (D) The expression and location of cleaved Caspase3 and N-Cadherin were determined by IHC (Frozen); scale bar = 400 μm; (E) The

protein level of total and cleaved Caspase3, BAX, N-Cadherin, E-Cadherin,  $\beta$ -Catenin, Vimentin and SNAIL1 was determined by western blot. GAPDH was used as an internal control. (F) The mRNA level of the apoptosis-related, pro-inflammation and EMT-related genes was determined by qRT-PCR. The data are expressed as the mean  $\pm$  SD for at least triplicate experiments. \* $p < 0.05$  stands for vs NC. # $p < 0.05$  stands for vs NC + CCl<sub>4</sub>.

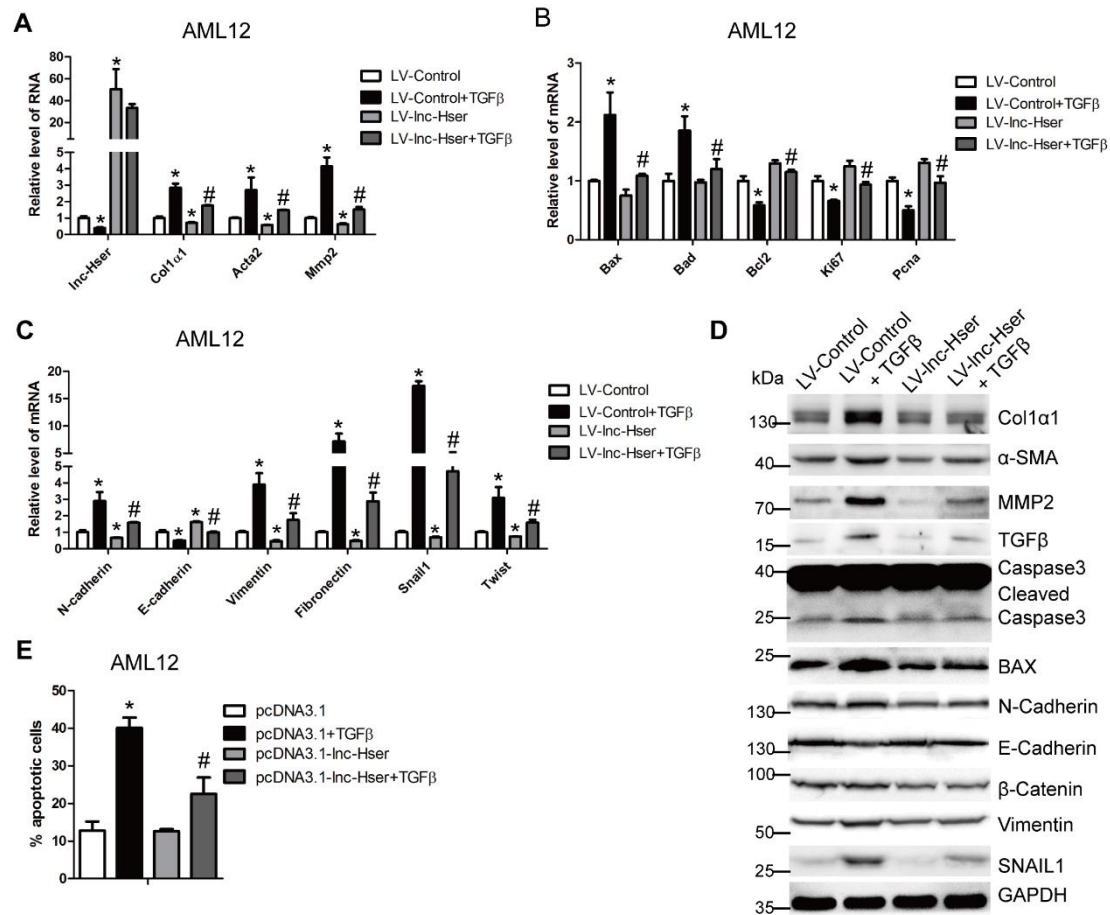

**Fig. S3, related to Fig. 3.** (A-D) AML12 cells were infected with LV-Inc-Hser for 72 h and further treated with 10 ng/ml TGFβ for additional 24 h. The RNA level of *Inc-Hser*, pro-fibrogenic genes (A), apoptosis and proliferation -related genes (B) and EMT-related genes (C) was detected by qRT-PCR. The protein level of α-SMA, Col1α1, MMP2, total and cleaved Caspase3, BAX, N-Cadherin, E-cadherin, Vimentin, β-Catenin and SNAIL1 was detected by western blot. GAPDH was used as an internal control (D). (E) AML12 cells were transfected with pcDNA3.1-Inc-Hser or pcDNA3.1 for 48 h and further treated with 10 ng/ml TGFβ for additional 24 h. Cell apoptosis was determined by FACS analysis. The data are expressed as the mean ± SD for at least triplicate experiments. \* $p < 0.05$  stands for vs LV-Control or pcDNA3.1. # $p < 0.05$  stands for vs LV-Control + TGFβ or pcDNA3.1 + TGFβ.

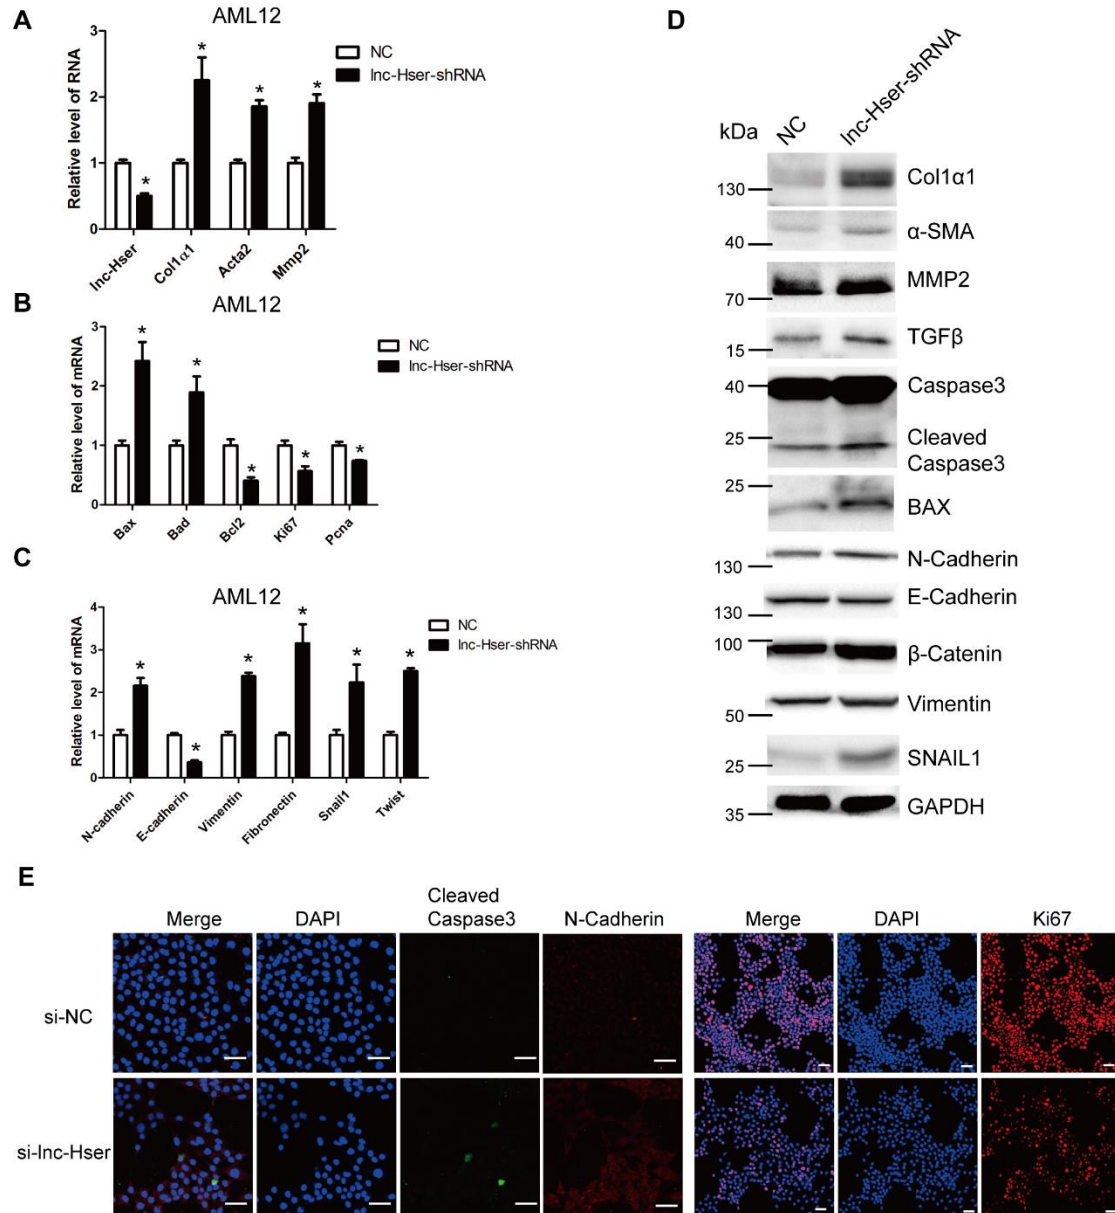

**Fig. S4, related to Fig. 3.** (A-D) The expression of Inc-Hser, pro-fibrogenic genes (A), apoptosis and proliferation -related genes (B) and EMT-related genes (C) was detected in AML12 cells infected with lenti-Inc-Hser-shRNA or lenti-NC by qRT-PCR (A-C) and western blot. GAPDH was used as an internal control (D). (E) AML12 cells were transfected with siRNA-Inc-Hser or si-NC for 36 h, the expression and location of cleaved Caspase3, N-Cadherin and Ki67 was determined by confocal microscopy. DAPI stained nuclei blue; scale bar = 50  $\mu$ m. The data are expressed as the mean  $\pm$  SD for at least triplicate experiments, \* $p$ <0.05.

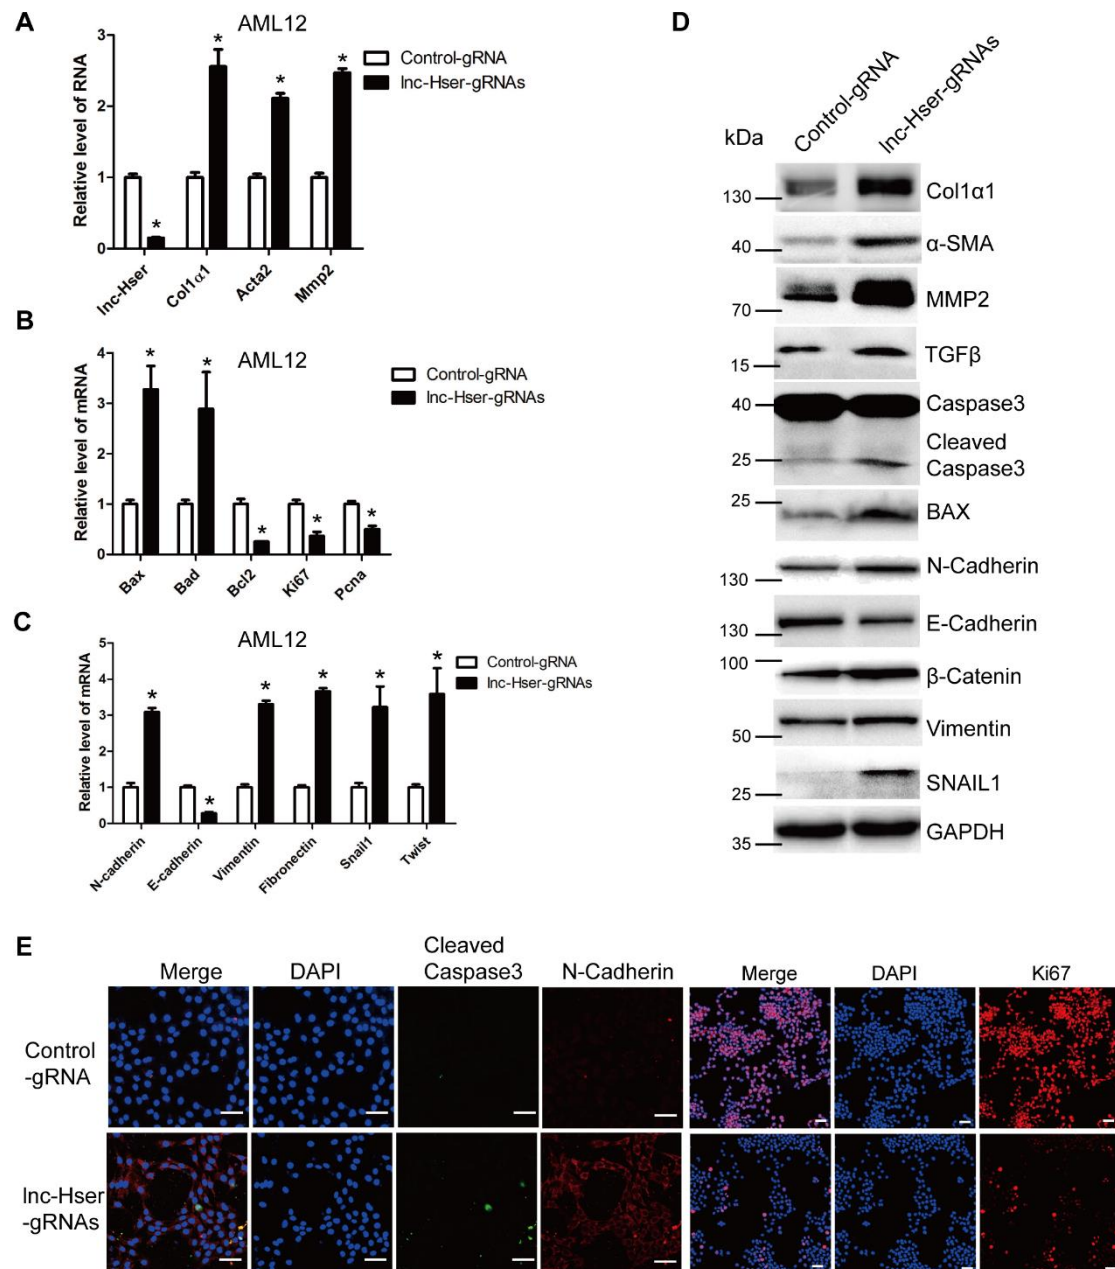

**Fig. S5, related to Fig. 3.** The expression of Inc-Hser was stably knocked down by the CRISPR/Cas9 system with guide RNA pairs in AML12 cells. (A-E) The expression of Inc-Hser, pro-fibrogenic genes (A), apoptosis and proliferation -related genes (B) and EMT-related genes (C) was detected in Inc-Hser-silenced AML12 cells by qRT-PCR (A-C) and western blot. GAPDH was used as an internal control (D). The expression and location of cleaved Caspase3, N-Cadherin and Ki67 was determined by confocal microscopy. DAPI stained nuclei blue; scale bar = 50  $\mu$ m (E). The data are expressed as the mean  $\pm$  SD for at least triplicate experiments, \* $p$ <0.05.

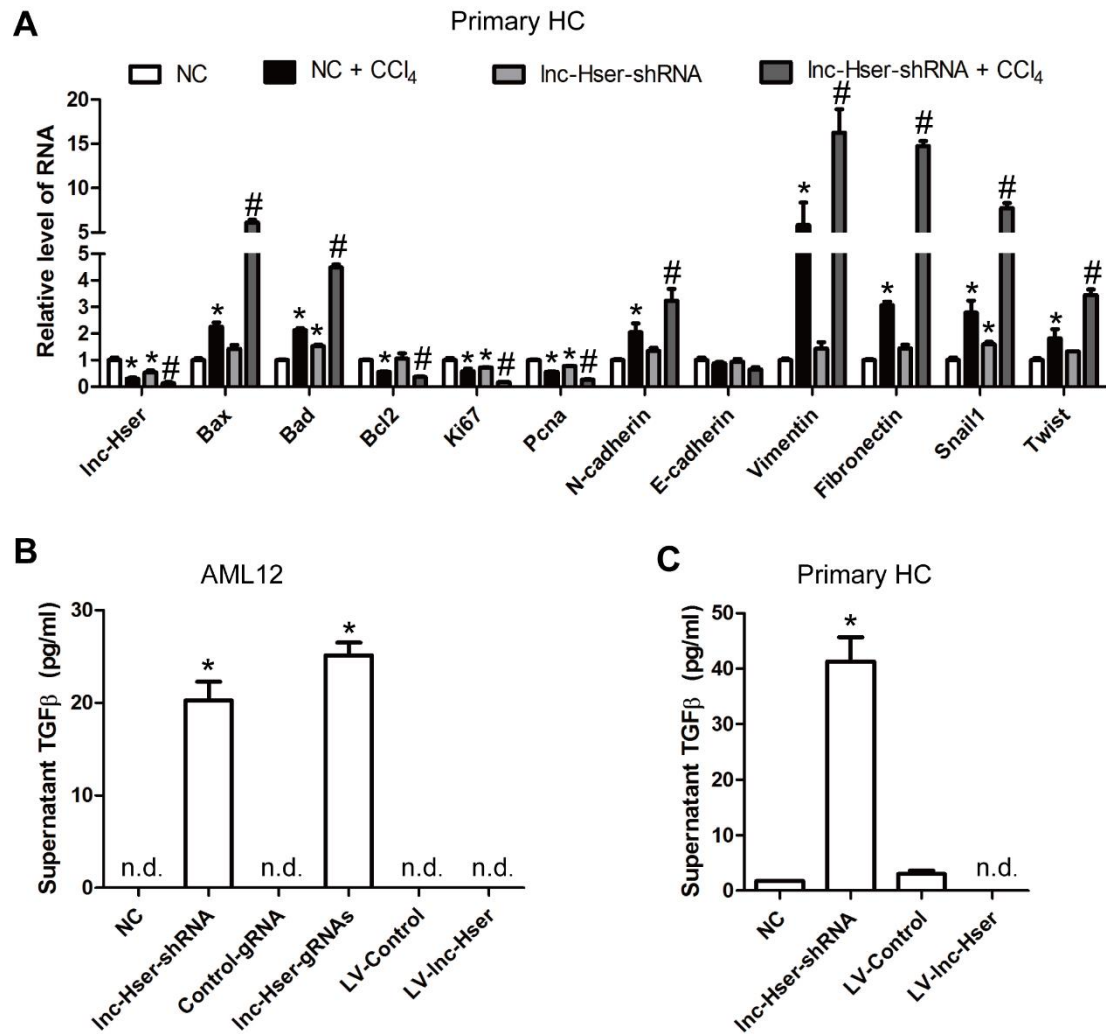

**Fig. S6, related to Fig. 3, 4.** (A) Mice were treated with oil in combination with injection of lenti-NC (Negative Control,  $n = 10$ ), or CCl<sub>4</sub> in combination with injection of lenti-NC (NC + CCl<sub>4</sub>,  $n = 10$ ), or oil in combination with injection of lenti-*Inc-Hser*-shRNA (Inc-Hser-shRNA,  $n = 10$ ), or CCl<sub>4</sub> in combination with injection of lenti-*Inc-Hser*-shRNA (Inc-Hser-shRNA + CCl<sub>4</sub>,  $n = 10$ ). qRT-PCR analysis of *Inc-Hser*, apoptosis and proliferation -related genes and EMT-related genes level in the primary HCs isolated from mice in each group. (B) The level of TGFβ in supernatant from Control, *Inc-Hser*-silenced and *Inc-Hser*-over-expressed AML12 and primary HCs was detected by ELISA. The data are expressed as the mean  $\pm$  SD for at least triplicate experiments. \* $p < 0.05$  stands for vs NC or Control-gRNA or LV-Control. # $p < 0.05$  stands for vs NC + CCl<sub>4</sub>.

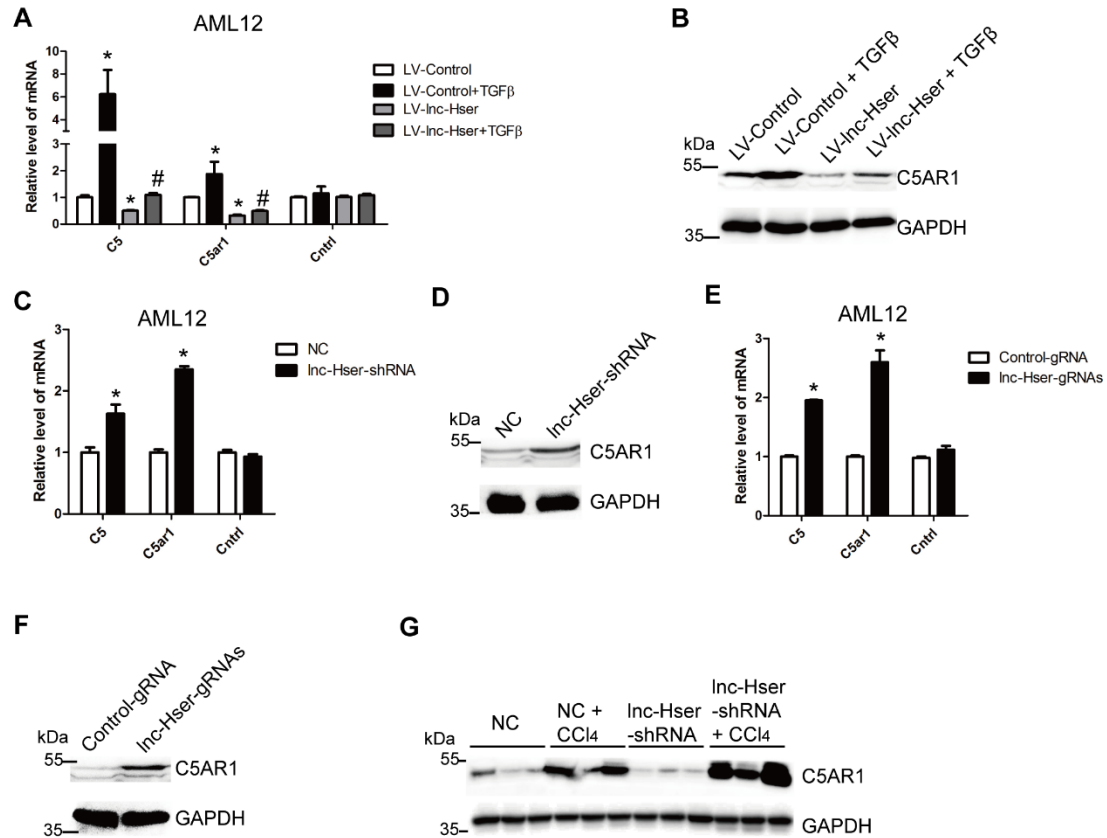

**Fig. S7, related to Fig. 5.** (A, B) AML12 cells were infected with LV-Inc-Hser for 72 h and further treated with 10 ng/ml TGFβ for additional 24 h. The mRNA level of *C5*, *C5ar1* and *Cntrl* was detected by qRT-PCR (A). The protein level of C5AR1 was detected by western blot. GAPDH was used as an internal control (B). (C-F) The expression of *C5*, *C5AR1* and *CNTRL* was detected in Inc-Hser-silenced AML12 cells by qRT-PCR (C, E) and western blot. GAPDH was used as an internal control (D, F). (G) Mice were treated with oil in combination with injection of lenti-NC (Negative Control, n = 10), or CCl<sub>4</sub> in combination with injection of lenti-NC (NC + CCl<sub>4</sub>, n = 10), or oil in combination with injection of lenti-Inc-Hser-shRNA (Inc-Hser-shRNA, n = 10), or CCl<sub>4</sub> in combination with injection of lenti-Inc-Hser-shRNA (Inc-Hser-shRNA + CCl<sub>4</sub>, n = 10). The protein level of C5AR1 in livers of mice in each group was detected by western blot. GAPDH was used as an internal control (B). The data are expressed as the mean ± SD for at least triplicate experiments. \**p*<0.05 stands for vs LV-Control or NC or Control gRNA. #*p*<0.05 stands for vs LV-Control + TGFβ.

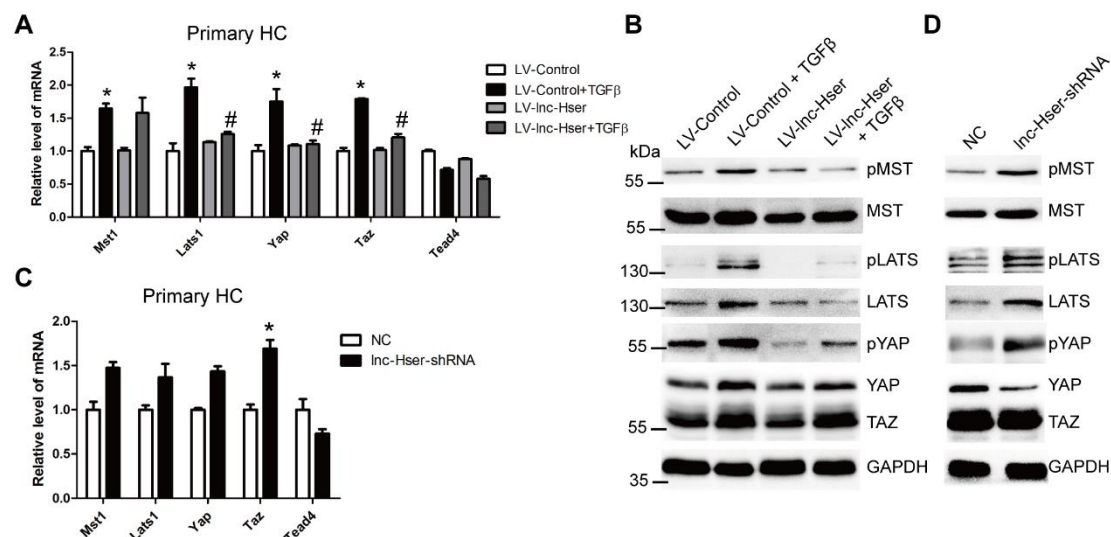

**Fig. S8, related to Fig. 5.** (A, B) Primary HCs were infected with LV-Inc-Hser for 72 h and further treated with 10 ng/ml TGFβ for additional 24 h. The mRNA level of *Mst1*, *Lats1*, *Yap*, *Taz* and *Tead4* was detected by qRT-PCR (A). The protein level of pMST, MST, pLATS, LATS, pYAP and YAP/TAZ was detected by western blot (B). GAPDH was used as an internal control. (C) The expression of *Mst1*, *Lats1*, *Yap*, *Taz* and *Tead4* was detected in primary HCs infected with lenti-Inc-Hser-shRNA or lenti-NC by qRT-PCR. (D) The protein level of pMST, MST, pLATS, LATS, pYAP and YAP/TAZ was detected in primary HCs infected with lenti-Inc-Hser-shRNA or lenti-NC by western blot. GAPDH was used as an internal control. The data are expressed as the mean ± SD for at least triplicate experiments. \* $p < 0.05$  stands for vs LV-Control or NC. # $p < 0.05$  stands for vs LV-Control + TGFβ.



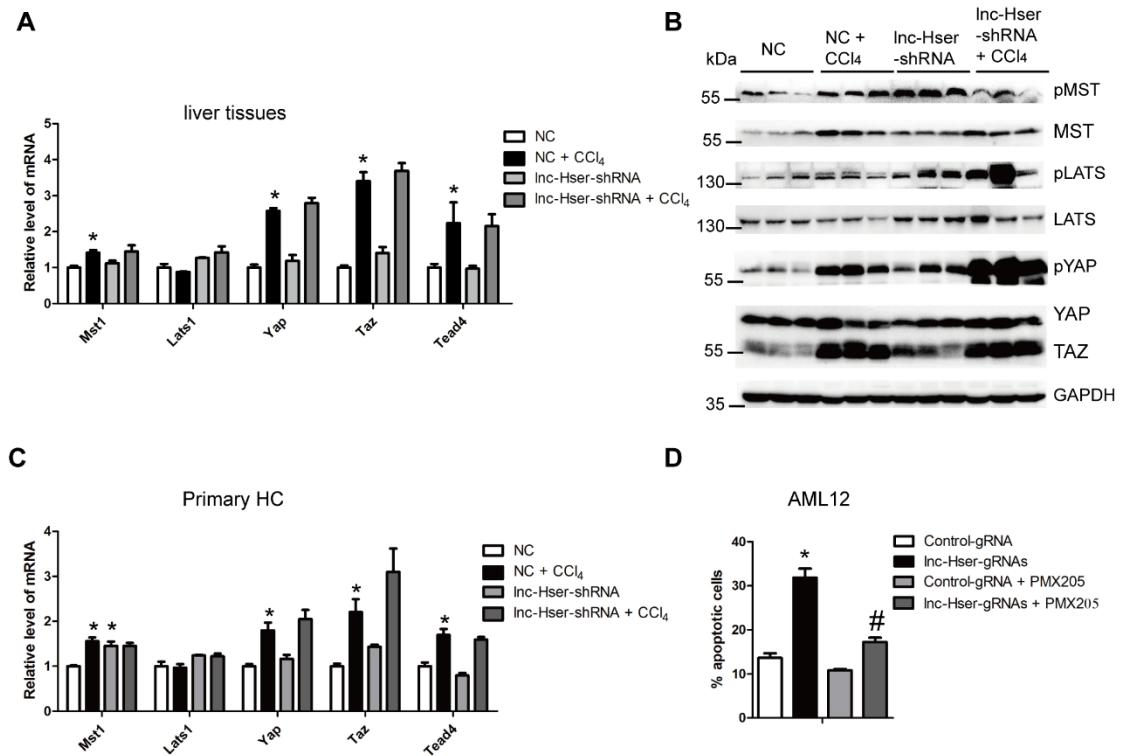

**Fig. S10, related to Fig. 5.** Mice were treated with oil in combination with injection of lenti-NC (Negative Control,  $n = 10$ ), or CCl<sub>4</sub> in combination with injection of lenti-NC (NC + CCl<sub>4</sub>,  $n = 10$ ), or oil in combination with injection of lenti-*Inc-Hser-shRNA* (*Inc-Hser-shRNA*,  $n = 10$ ), or CCl<sub>4</sub> in combination with injection of lenti-*Inc-Hser-shRNA* (*Inc-Hser-shRNA* + CCl<sub>4</sub>,  $n = 10$ ). (A) The mRNA level of *Mst1*, *Lats1*, *Yap*, *Taz* and *Tead4* was detected in livers by qRT-PCR. (B) The protein level of pMST, MST, pLATS, LATS, pYAP and YAP/TAZ was detected in livers by western blot. GAPDH was used as an internal control. (C) The mRNA level of *Mst1*, *Lats1*, *Yap*, *Taz* and *Tead4* was detected in the primary HCs isolated from mice in each group, by qRT-PCR. (D) The expression of *Inc-Hser* was stably knocked down by the CRISPR/Cas9 system with guide RNA pairs in AML12 cells. PMX205, a specific inhibitor of C5AR1, was added in *Inc-Hser*-silenced AML12 cells for 24 h. Cell apoptosis was determined by FACS analysis. The data are expressed as the mean  $\pm$  SD for at least triplicate experiments. \* $p < 0.05$  stands for vs NC or Control-gRNA. # $p < 0.05$  stands for vs NC + CCl<sub>4</sub> or *Inc-Hser*-gRNAs.

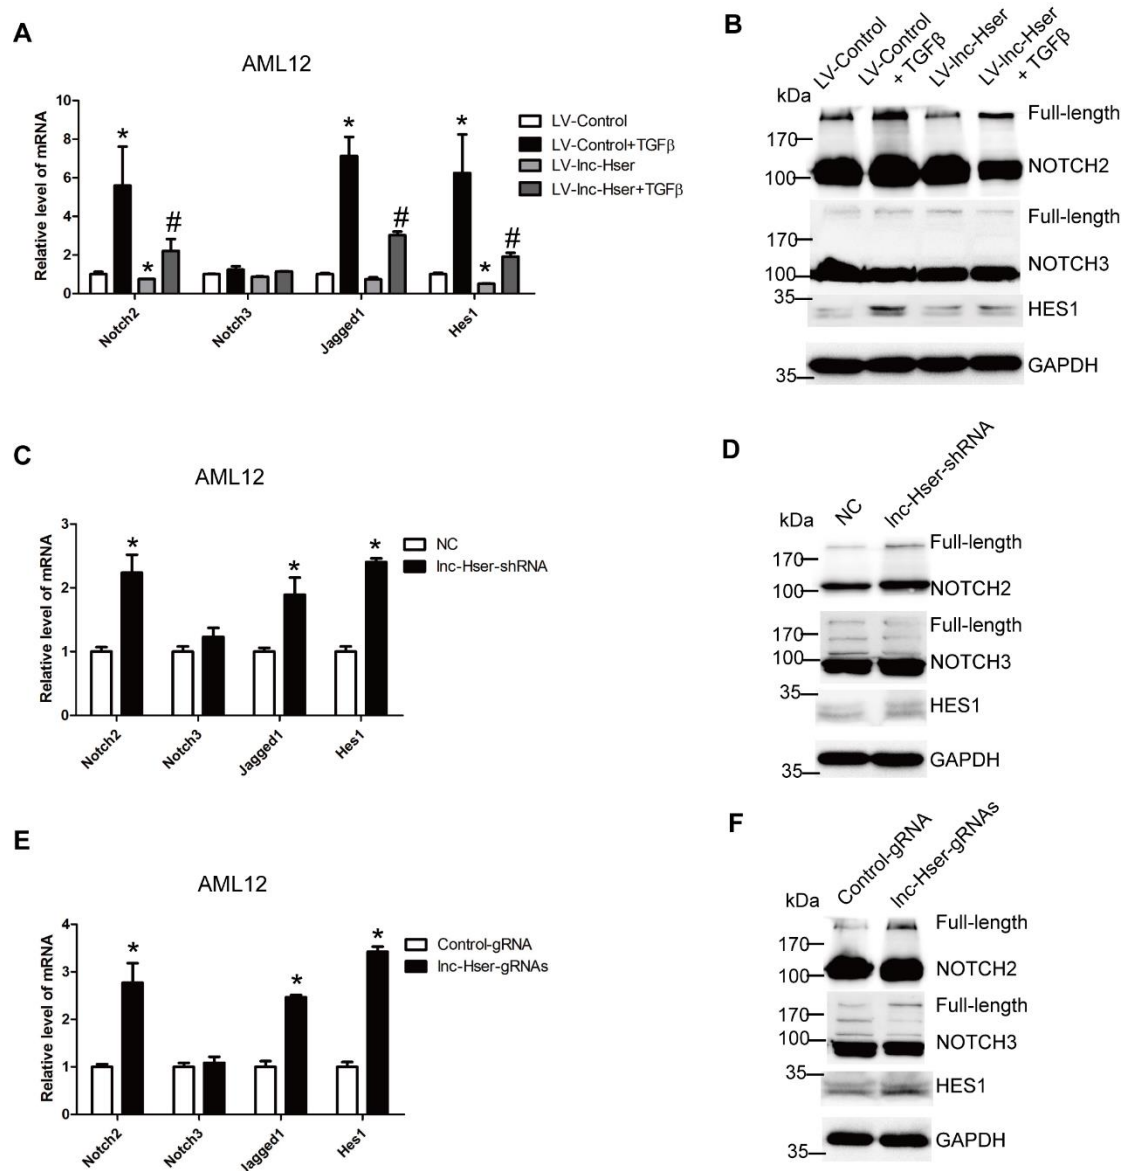

**Fig. S11, related to Fig. 6.** (A, B) AML12 cells were infected with LV-Inc-Hser for 72 h and further treated with TGF $\beta$  for additional 24 h. The expression of Notch2, Notch3, Jagged1 and Hes1 was detected by qRT-PCR (A) and western blot. GAPDH was used as an internal control (B). (C, D) The expression of Notch2, Notch3, Jagged1 and Hes1 in AML12 cells infected with lenti-Inc-Hser-shRNA or lenti-NC was detected by qRT-PCR (C) and western blot. GAPDH was used as an internal control (D). (E, F) The expression of Notch2, Notch3, Jagged1 and Hes1 in Inc-Hser-silenced AML12 cells was detected by qRT-PCR (E) and western blot. GAPDH was used as an internal control (F). The data are expressed as the mean  $\pm$  SD for at least triplicate experiments. \* $p$ <0.05 stands for vs LV-Control or NC or Control gRNA. # $p$ <0.05 stands for vs LV-Control + TGF $\beta$ .

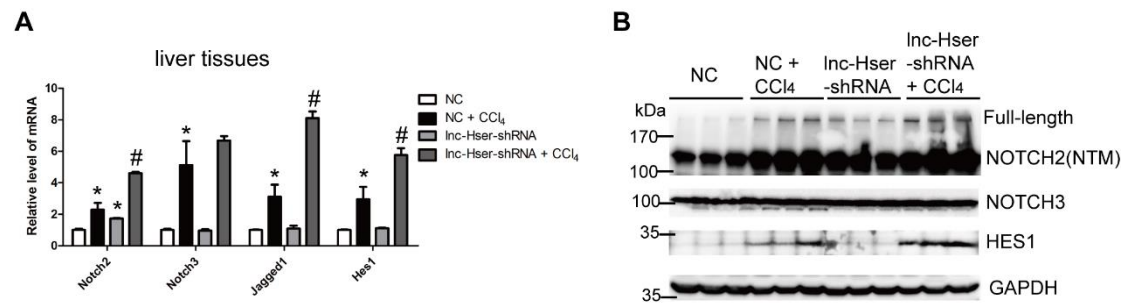

**Fig. S12, related to Fig. 6.** Mice were treated with oil in combination with injection of lenti-NC (Negative Control,  $n = 10$ ), or CCl<sub>4</sub> in combination with injection of lenti-NC (NC + CCl<sub>4</sub>,  $n = 10$ ), or oil in combination with injection of lenti-lnc-Hser-shRNA (lnc-Hser-shRNA,  $n = 10$ ), or CCl<sub>4</sub> in combination with injection of lenti-lnc-Hser-shRNA (lnc-Hser-shRNA + CCl<sub>4</sub>,  $n = 10$ ). (A) The mRNA level of *Notch2*, *Notch3*, *Jagged1* and *Hes1* was detected in livers by qRT-PCR. (B) The protein level of Notch2, Notch3 and Hes1 was detected in livers by western blot. GAPDH was used as an internal control. The data are expressed as the mean  $\pm$  SD for at least triplicate experiments. \* $p < 0.05$  stands for vs NC. # $p < 0.05$  stands for vs NC + CCl<sub>4</sub>.

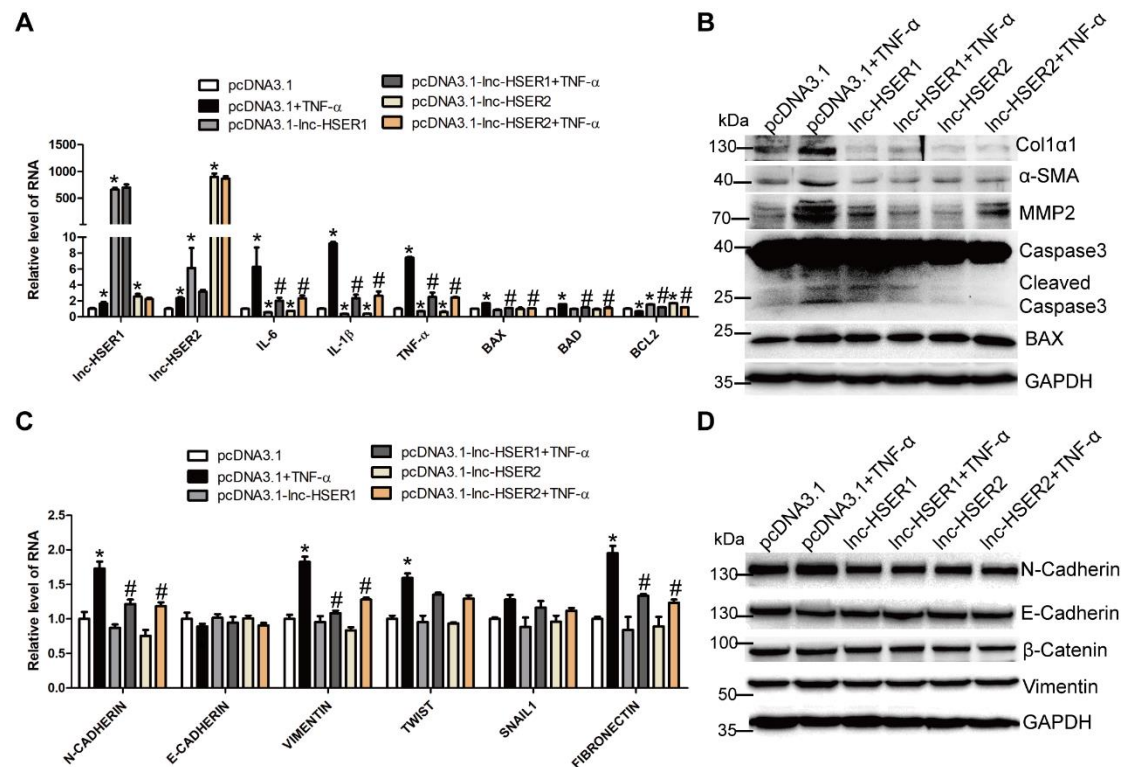

**Fig. S13, related to Fig. 7.** Inc-HSER1/2 ameliorates TNF- $\alpha$ -induced apoptosis and inflammation of L02 cells. (A-D) L02 cells were transfected with pcDNA3.1, pcDNA3.1-Inc-HSER1 and pcDNA3.1-Inc-HSER2 for 48 h and further treated with TNF- $\alpha$  for additional 24 h. (A) The RNA level of *Inc-HSER1*, *Inc-HSER2*, pro-inflammation genes, apoptosis-related genes was detected by qRT-PCR. (B) The protein level of  $\alpha$ -SMA, Col1 $\alpha$ 1, MMP2, total and cleaved Caspase3 and BAX was detected by western blot. GAPDH was used as an internal control. (C, D) The expression of EMT-related genes was detected by qRT-PCR (C) and western blot (D). GAPDH was used as an internal control. The data are expressed as the mean  $\pm$  SD for at least triplicate experiments. \* $p < 0.05$  stands for vs pcDNA3.1. # $p < 0.05$  stands for vs pcDNA3.1 + TNF- $\alpha$ .

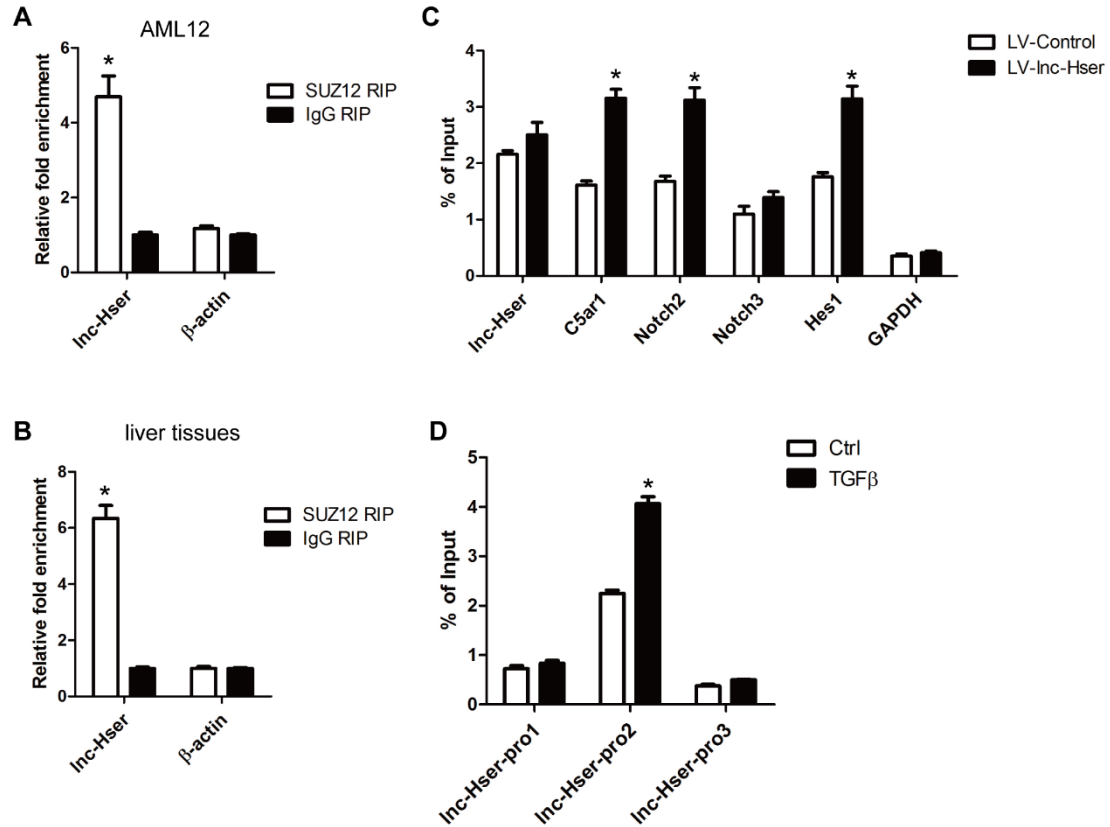

**Fig. S14.** Inc-Hser interacts with PRC2. (A, B) qRT-PCR detection of Inc-Hser and  $\beta$ -Actin retrieved by SUZ12-specific antibody compared with IgG in the RIP assay with AML12 cells (A) and the single cell suspensions isolated from mouse liver (B). (C) AML12 cells were infected with LV-Inc-Hser or LV-Control, and ChIP analyses were performed on indicated genes promoter regions using anti-SUZ12 antibody. (D) AML12 cells were treated with or without TGF $\beta$ , and ChIP analyses were performed on the promoter regions of Inc-Hser using anti-SUZ12 antibody. Enrichment was shown relative to input. The data are expressed as the mean  $\pm$  SD for at least triplicate experiments, \* $p$ <0.05.

## Supplementary Tables

**Table S1. Primers and Oligonucleotides**

**qRT-PCR primers for analysis of transcript levels**

| Gene symbol           | Forward 5' - 3'           | Reverse 5' - 3'           |
|-----------------------|---------------------------|---------------------------|
| Mouse Inc-Hser        | GCTCTTTCATGGGAGCAACT      | TCATTGCCTTTGGCTTTCTC      |
| Mouse Inc-Hser        | GCCAAAGGCAATGAGACTCC      | CAAATGCCTCAGTATGGCCG      |
| Mouse $\beta$ -Actin  | ATGCCACAGGATTCCATACCCAAGA | CTCTAGACTTCGAGCAGGAGATGG  |
| Mouse Gapdh           | GGCATGGACTGTGGTCATGAG     | TGCACCACCAACTGCTTAGC      |
| Mouse Malat1          | AAATTGATGGCCTTTTCTGG      | AGCTGGATCCTTGAGGTCAC      |
| Mouse Col1 $\alpha$ 1 | ATCGGTCATGCTCTCTCCAAACCA  | ACTGCAACATGGAGACAGGTCAGA  |
| Mouse Col1 $\alpha$ 2 | CCTTTGTCAGAATACTGAGCAGC   | GTAACCTCGTGCCTAGCAACA     |
| Mouse Col3 $\alpha$ 1 | TGCTCCAGTTAGCCCTGCAA      | GGTCCTGCAGGCAACAGTGGTTC   |
| Mouse Col4 $\alpha$ 5 | CTCCCTTACCGCCCTTTTCTC     | AGGCGAAATGGGTATGATGGG     |
| Mouse Acta2           | TCGGATACTTCAGCGTCAGGA     | GTCCCAGACATCAGGGAGTAA     |
| Mouse PcnA            | TTTGAGGCACGCCTGATCC       | GGAGACGTGAGACGAGTCCAT     |
| Mouse Ki67            | CATCCATCAGCCGGAGTCA       | TGTTTCGCAACTTTCGTTTGTG    |
| Mouse Ctgf            | ATCCAGGCAAGTGCATTGGTA     | GGGCCTCTTCTGCGATTTCT      |
| Mouse Bax             | TTGCTGATGGCAACTTCAAC      | GATCAGCTCGGGCACTTTAG      |
| Mouse Bad             | AGAGTATGTTCCAGATCCCAG     | GTCCTCGAAAAGGGCTAAGC      |
| Mouse Bcl2            | GCTGGGATGCCTTTGTGGAAC     | CAGAGACAGCCAGGAGAAATCAAAC |
| Mouse Tnfa            | CATCTTCTCAAAATTCGAGTGACAA | TGGGAGTAGACAAGGTACAACCC   |
| Mouse Il-1 $\beta$    | GTCGCTCAGGGTCACAAGAA      | GTGCTGCCTAATGTCCCCTT      |
| Mouse Mcp1            | GTTAACGCCCCACTCACCTG      | GGGCCGGGGTATGTAACCTCA     |
| Mouse Il-6            | AGTTGCCTTCTTGGGACTGA      | TCCACGATTTCCAGAGAAC       |
| Mouse Mmp2            | GTGTTCTTCGCAGGGAATGAG     | GATGCTTCCAACTTCACGCT      |
| Mouse Mmp9            | ACCACAGCCAACTATGACCAGGAT  | AAGAGTACTGCTTGCCCAGGAAGA  |
| Mouse Tgfb $\beta$ 1  | TGTGTTGGTTGTAGAGGGCAAGGA  | TTTGGAGCCTGGACACACAGTACA  |
| Mouse Pdgfb $\beta$ 1 | CTGCCACAGCATGATGAGGAT     | GCCAGGATGGCTGAGATCACCAC   |
| Mouse E-Cadherin      | AACCCAAGCACGTATCAGGG      | GAGTGTGGGGGCATCATCA       |

|                       |                          |                         |
|-----------------------|--------------------------|-------------------------|
| Mouse N-Cadherin      | ACAGCGCAGTCTTACCGAAG     | TGGCTCGCTGCTTTCATAC     |
| Mouse Vimentin        | CTTGAACGGAAAGTGAATCCT    | GTCAGGCTTGAAACGTCC      |
| Mouse Fibronectin     | GCTCAGCAAATCGTGCAGC      | CTAGGTAGGTCCGTTCCCACT   |
| Mouse Snail1          | CACACGCTGCCTTGTGTCT      | GGTCAGCAAAAGCACGGTT     |
| Mouse Twist           | CTGCCCTCGGACAAGCTGAG     | CTAGTGGGACGCGGACATGG    |
| Mouse Notch2          | TGACTGTTCCCTCACTATGG     | CACGTCTTGCTATTCTCTG     |
| Mouse Notch3          | TTGTCTGGATGGAAGCCCATGT   | ACTGAACTCTGGCAAACGCCT   |
| Mouse Jagged1         | GGGAGAGTGATACTTGATGGG    | CTCATTGTGGCTTTTGTGGAG   |
| Mouse Hes1            | CTCCCGGCATTCCAAGCTAG     | AGCGGGTCACCTCGTTCATG    |
| Mouse Mst1            | GAACACAGACCTGTGGATTG     | CGCCTTGATATCTCGGTGTA    |
| Mouse Mst2            | TCTCCTCAATACAGAAGGAC     | AGAAGTAATGCCAAGGGACC    |
| Mouse Lats1           | TGGTGACTCTGGGGATAAAGAA   | GGGAGTAACTCTGAATCCGAGAC |
| Mouse Lats2           | ATCCTCCCAAAGGGTACAGCACAG | TGGTGGCGTCTTGTTCTGGAAG  |
| Mouse Yap             | ACCCTCGTTTTGCCATGAAC     | CCTTCTCCATCTGTAAGTGC    |
| Mouse Taz             | TCCTATGACGTGACCGACGA     | GGGTCTTGCCATGTGGTGAT    |
| Mouse Tead4           | TGATGCAGAGGGTGTATGGA     | GATCAGCTCATTCCGACCAT    |
| Mouse C5              | CCTGCTGAAGCCCAAGAGAA     | GCAGGGTGTTTTCAAGCAGG    |
| Mouse C5ar1           | AGGTCTCTCCCCAGCATCAT     | GTCGTGGACGGAGTGAAAGT    |
| Mouse Cntrl           | AGAAGCGTGAAGATGCCAGA     | GCTGGTCTTTGGCAATGGTG    |
| Human $\beta$ -ACTIN  | GCCGGGACCTGACTGACTAC     | TTCTCCTTAATGTCACGCACGAT |
| Human GAPDH           | ACCCAGAAGACTGTGGATGG     | TTCAGCTCAGGGATGACCTT    |
| Human Inc-HSER1       | AGTAGTCACTGAGGCTGACG     | GCCTCTCAGCGTACTTCCG     |
| Human Inc-HSER2       | CGTGCAAGTGTGTAGAAGCTG    | ATGAACGAATGAATTCTCACCAG |
| ENST00000466280       | AGGCGTTGGCATTTCAAACA     | TGGATCTGTTCTCCTCGTACA   |
| ENST00000489802       | CTGCGTATGCTCTTTCCTG      | ACATAGGATACTCAATGCATATT |
| NR_148450             | CTGGGGCCGAAAGAACAGTC     | TGCCTGTCTTTGTGTGGTTGA   |
| Human COL1 $\alpha$ 1 | AACCAAGGCTGCAACCTGGA     | GGCTGAGTAGGGTACACGCAGG  |
| Human ACTA2           | GCCATGTTCTATCGGGTACTTC   | CAGGGCTGTTTTCCCATCCAT   |
| Human IL-6            | CAGGAGCCCAGCTATGAACT     | GAAGGCAGCAGGCAACAC      |

|                     |                        |                          |
|---------------------|------------------------|--------------------------|
| Human IL-1 $\beta$  | GCAGAAGTACCTGAGCTCGC   | CTTGCTGTAGTGGTGGTCGG     |
| Human TNF- $\alpha$ | CCTGCCCCAATCCCTTTATT   | CCCTAAGCCCCCAATTCTCT     |
| Human BAX           | TCAGGATGCGTCCACCAAGAA  | TCTGCAGCTCCATGTTACTGTCCA |
| Human BAD           | CAGACCCGGCAGACAGATGAG  | CTCACTCGGCTCAAACCTCTGG   |
| Human BCL2          | GTGGAGAGCGTCAACCGGGAGA | GGGCCGTACAGTTCCACAAAGGC  |
| Human N-CADHERIN    | TCAGGCTCCAAGCACCCCTTCA | ATGACGGCCGTGGCTGTGTT     |
| Human E-CADHERIN    | CATGAGTGTCCCCCGGTATC   | CAGTATCAGCCGCTTTCAGA     |
| Human VIMENTIN      | ATTCCACTTTGCGTTCAAGG   | CTTCAGAGAGAGGAAGCCGA     |
| Human TWIST         | TGCGGAAGATCATCCCCACG   | GCTGCAGCTTGCCATCTTGGA    |
| Human SNAIL1        | GCACATCCGAAGCCACAC     | GGAGAAGGTCCGAGCACAC      |
| Human FIBRONECTIN   | CTTTGGTGCAGCACAACTTC   | TCCTCCTCGAGTCTGAACCA     |
| Human C5AR1         | TCCTGCCCTCCCTCATC      | GCTGTAGTCCACGCCAC        |
| Human C5            | ATGAAACCTGTGAGCAGCGA   | GCTTGCGACGACACAACATT     |

### Cloning primers for Inc-Hser

| Name                  | Sequence 5' - 3'                  |
|-----------------------|-----------------------------------|
| Inc-Hser 5' BamHI F1  | cgcggatccGGTTGCTGTTTGTTAGCAGGC    |
| Inc-Hser 5' BamHI R1  | cgcggatccTATGATTGCAGTGTTTTGGA     |
| Inc-HSER1 5' BamHI F1 | cgcggatccCTTCAAGATTCCGTCTAATCC    |
| Inc-HSER1 5' BamHI R1 | cgcggatccAGTGTCAAAAGTAAAGTAGATAAC |
| Inc-HSER1 5' BamHI F2 | cgcggatccCTTCAAGATTCCGTCTAATC     |
| Inc-HSER1 5' Xho1 R2  | ccgctcgagAGTGTCAAAAGTAAAGTAGA     |
| Inc-HSER2 5' BamHI F1 | cgcggatccCCTGCCACTTTCACAGTGTAC    |
| Inc-HSER2 5' BamHI R1 | cgcggatccCCCCAAAACATGCAATTTACC    |
| Inc-HSER2 5' BamHI F2 | cgcggatccCCTGCCACTTTCACAGTGTA     |
| Inc-HSER2 5' Xho1 R2  | ccgctcgagCCAAAACATGCAATTTACCC     |

### shRNA sequences

| Name                        | Sequence 5' - 3'                                                 |
|-----------------------------|------------------------------------------------------------------|
| Mouse sh-lnc-Hser-1 Forward | GATCCCCGGACTGTATTTGTCACAAGTTCAAGAGACTTGTGACAAATACAGTC<br>CTTTTTA |
| Mouse sh-lnc-Hser-1 Reverse | AGCTTAAAAAGGACTGTATTTGTCACAAGTCTCTTGAAGTTGTGACAAATACA<br>GTCCGGG |
| Mouse sh-lnc-Hser-2 Forward | GATCCCCCATGGCTGAGTCCTCATTTTCAAGAGAAATGAGGACTCAGCCAT<br>GGTTTTTA  |
| Mouse sh-lnc-Hser-2 Reverse | AGCTTAAAAACCATGGCTGAGTCCTCATTTCTCTTGAAATGAGGACTCAGCC<br>ATGGGGG  |
| Negative control Forward    | GATCCCCGTTCTCCGAACGTGTCACGTTCAAGAGACGTGACACGTTCCGAG<br>AACTTTTTA |
| Negative control Reverse    | AGCTTAAAAAGTTCTCCGAACGTGTCACGTCTTTGAACGTGACACGTTCCGG<br>AGAACGGG |

### siRNA sequences

| Name                | Forward 5' - 3'       | Reverse 5' - 3'       |
|---------------------|-----------------------|-----------------------|
| Mouse si-lnc-Hser-1 | GGACUGUAUUUGUCACAAGTT | CUUGUGACAAUACAGUCCTT  |
| Mouse si-lnc-Hser-2 | CCAUGGCUGAGUCCUCAUUTT | AAUGAGGACUCAGCCAUGGTT |
| negative control    | GUUCUCCGAACGUGUCACGTT | CGUGACACGUUCGGAGAACTT |

### gRNA sequences

| Name                | Sequence 5' - 3'          |
|---------------------|---------------------------|
| Mouse gRNA1 Forward | caccgATATGCTCCCGACCCACCC  |
| Mouse gRNA1 Reverse | aaacGGGTGGGTCCGGGAGCATATc |
| Mouse gRNA2 Forward | caccgCGGCTCACCTGTAAGTTACG |
| Mouse gRNA2 Reverse | aaacCGTAACTTACAGGTGAGCCGc |

### RACE primers for Mouse-lnc-Hser

| gene specific primer | Sequence 5' - 3'                            |
|----------------------|---------------------------------------------|
| 3' OUTER PRIMER      | GATTACGCCAAGCTTGCTGAGCAGTGCCAGAGCATCAGAGCCA |
| 5' OUTER PRIMER      | GATTACGCCAAGCTTGCCATGGGAGCCTGGCCCTGTGAAGA   |
| 5' INNER PRIMER      | GATTACGCCAAGCTTGCAGGAGTCTCATTGCCTTTGGCTTTC  |

**Primers for Mouse ChIP qRT-PCR**

| Locus                  | Forward 5' - 3'         | Reverse 5' - 3'       |
|------------------------|-------------------------|-----------------------|
| Inc-Hser (-136--18)    | TTTGCCTCGTGCTCT         | CCTCACATTATGTACCCT    |
| Inc-Hser (-913--806)   | TAAGCGCATTGCCCTTCTC     | TGGTAGCATCCTTGGTCCTG  |
| Inc-Hser (-1994--1819) | ATGATGCCAAAAGCCCTCTGT   | AGGGCAGAGCAGAAGTTGAT  |
| C5aR (-131—36)         | CACATCTCCCTAACCCCTT     | CCCAGCCTGGTGGCTTTTAT  |
| C5aR (-800--711)       | ACAGAGTGTTGGGATTGCGT    | CCACCTGCATAGGAAGGACC  |
| C5aR (-1906--1827)     | GAACCTCTTGCAAGCCCACC    | GAACCTCTTGCAAGCCCACC  |
| Notch2 (-371--300)     | TTTGATGTTGGGCGCTTCAG    | GGTTTCCCGCAGAAAGAAGC  |
| Notch2 (-1123--1014)   | CACCCATTTGCACTTGCTGAA   | ACACGGGGAAGTCTTTATGGC |
| Notch2 (-1965--1890)   | GGTAACACCATGGGTGAACAAA  | GGCAATTTCTGCTTGTGCCAT |
| Notch3 (-234--165)     | TTGCAGACCTCGGTACACTC    | GATACCTGTCACGTCACGCA  |
| Notch3 (-1083--1014)   | CTCCATCACTAGGAGACCAAAGG | GTGTCTGTGTATGCCCTTCCA |
| Notch3 (-1908--1765)   | AGAACCTGGGGTTTCCAGTG    | GGGATCCAGTCTTCGGTCCA  |
| Hes1 (-223--60)        | TTGACGTTGTAGCCTCCGGT    | AACGGCTCGTGTGAACTTCC  |
| Hes1 (-1199--1007)     | CAGCTGCTATTACCTTCTTGGC  | AGCACGTGCCAGGATGTTTT  |
| Hes1 (-1609--1522)     | AAGTGCGGTCAGGCATCTC     | ATCTGAGCGTGGCCGAAAC   |
| Gapdh intron           | ATCCTGTAGGCCAGGTGATG    | AGGCTCAAGGGCTTTTAAGG  |

**Table S2. Baseline characteristics of patients with liver tissue**

| Metavir score            | Healthy (F0) | Mild fibrosis (F1-F2) | Advanced fibrosis (F3-F4) |
|--------------------------|--------------|-----------------------|---------------------------|
| Cases(n)                 | 6            | 16                    | 12                        |
| Age (years)*             | 57.7 ±15.7   | 53.6 ±10.3            | 50.8 ± 9.4                |
| Male sex ( <i>n</i> (%)) | 4 (66.7)     | 7 (43.8)              | 7(58.3)                   |
| ALT (U/L)*               | 22.0 ± 12.3  | 34.7 ± 32.0           | 32.5 ± 15.2               |
| AST (U/L)*               | 26.5 ± 12.6  | 60.5 ± 54.2           | 39.1 ± 16.3               |
| ALB (g/L)*               | 38.3 ± 7.9   | 41.3 ± 3.7            | 43.9 ±12.1                |
| GGT (U/L)*               | 47.3 ± 25.0  | 72.9 ± 50.4           | 122.5 ± 89.2              |
| Etiology ( <i>n</i> (%)) |              |                       |                           |
| Biliary Obstruction      | 0 (0)        | 2 (12.5)              | 0 (0)                     |
| HBV                      | 0 (0)        | 14 (87.5)             | 11 (91.7)                 |
| HCV                      | 0 (0)        | 0 (0)                 | 1 (8.3)                   |

\*Mean ± SD.

ALT, alanine aminotransferase; AST, aspartate aminotransferase; ALB, Albumin; GGT, γ-glutamyl transpeptidase; HBV, hepatitis B virus; HCV, hepatitis C virus.

**Table S3. Serum levels of ALT, AST in CCl<sub>4</sub>-induced liver fibrosis model (mean ± SD, n = 5)**

| Group                                   | ALT (U/L)                 | AST (U/L)                 |
|-----------------------------------------|---------------------------|---------------------------|
| NC group                                | 38.8 ± 8.4                | 47.9 ± 5.3                |
| NC + CCl <sub>4</sub> group             | 157.5 ± 23.7 <sup>*</sup> | 205.3 ± 35.8 <sup>*</sup> |
| Inc-Hser-shRNA group                    | 44.9 ± 5.5                | 53.4 ± 10.5               |
| Inc-Hser-shRNA + CCl <sub>4</sub> group | 261.6 ± 67.8 <sup>#</sup> | 293.9 ± 46.5 <sup>#</sup> |

<sup>\*</sup>*p*<0.05 compared with the NC group. <sup>#</sup>*p*<0.05 compared with NC + CCl<sub>4</sub> group. All statistical analyses were performed using SPSS version 13.0 software and *p*<0.05 indicated statistical significance.
